# Supplementary material for: A risk prediction model mediated by genes of APOD/APOC1/SQLE associates with prognosis in cervical cancer
Source: PubMed Central journal article supplement (PMC9764686; doi:10.1186/s12905-022-02083-4), 2022-12-19

Figure S1 The expression levels of the prognostic factors (APOD, APOC1 and SQLE) in TCGA-CESC dataset.

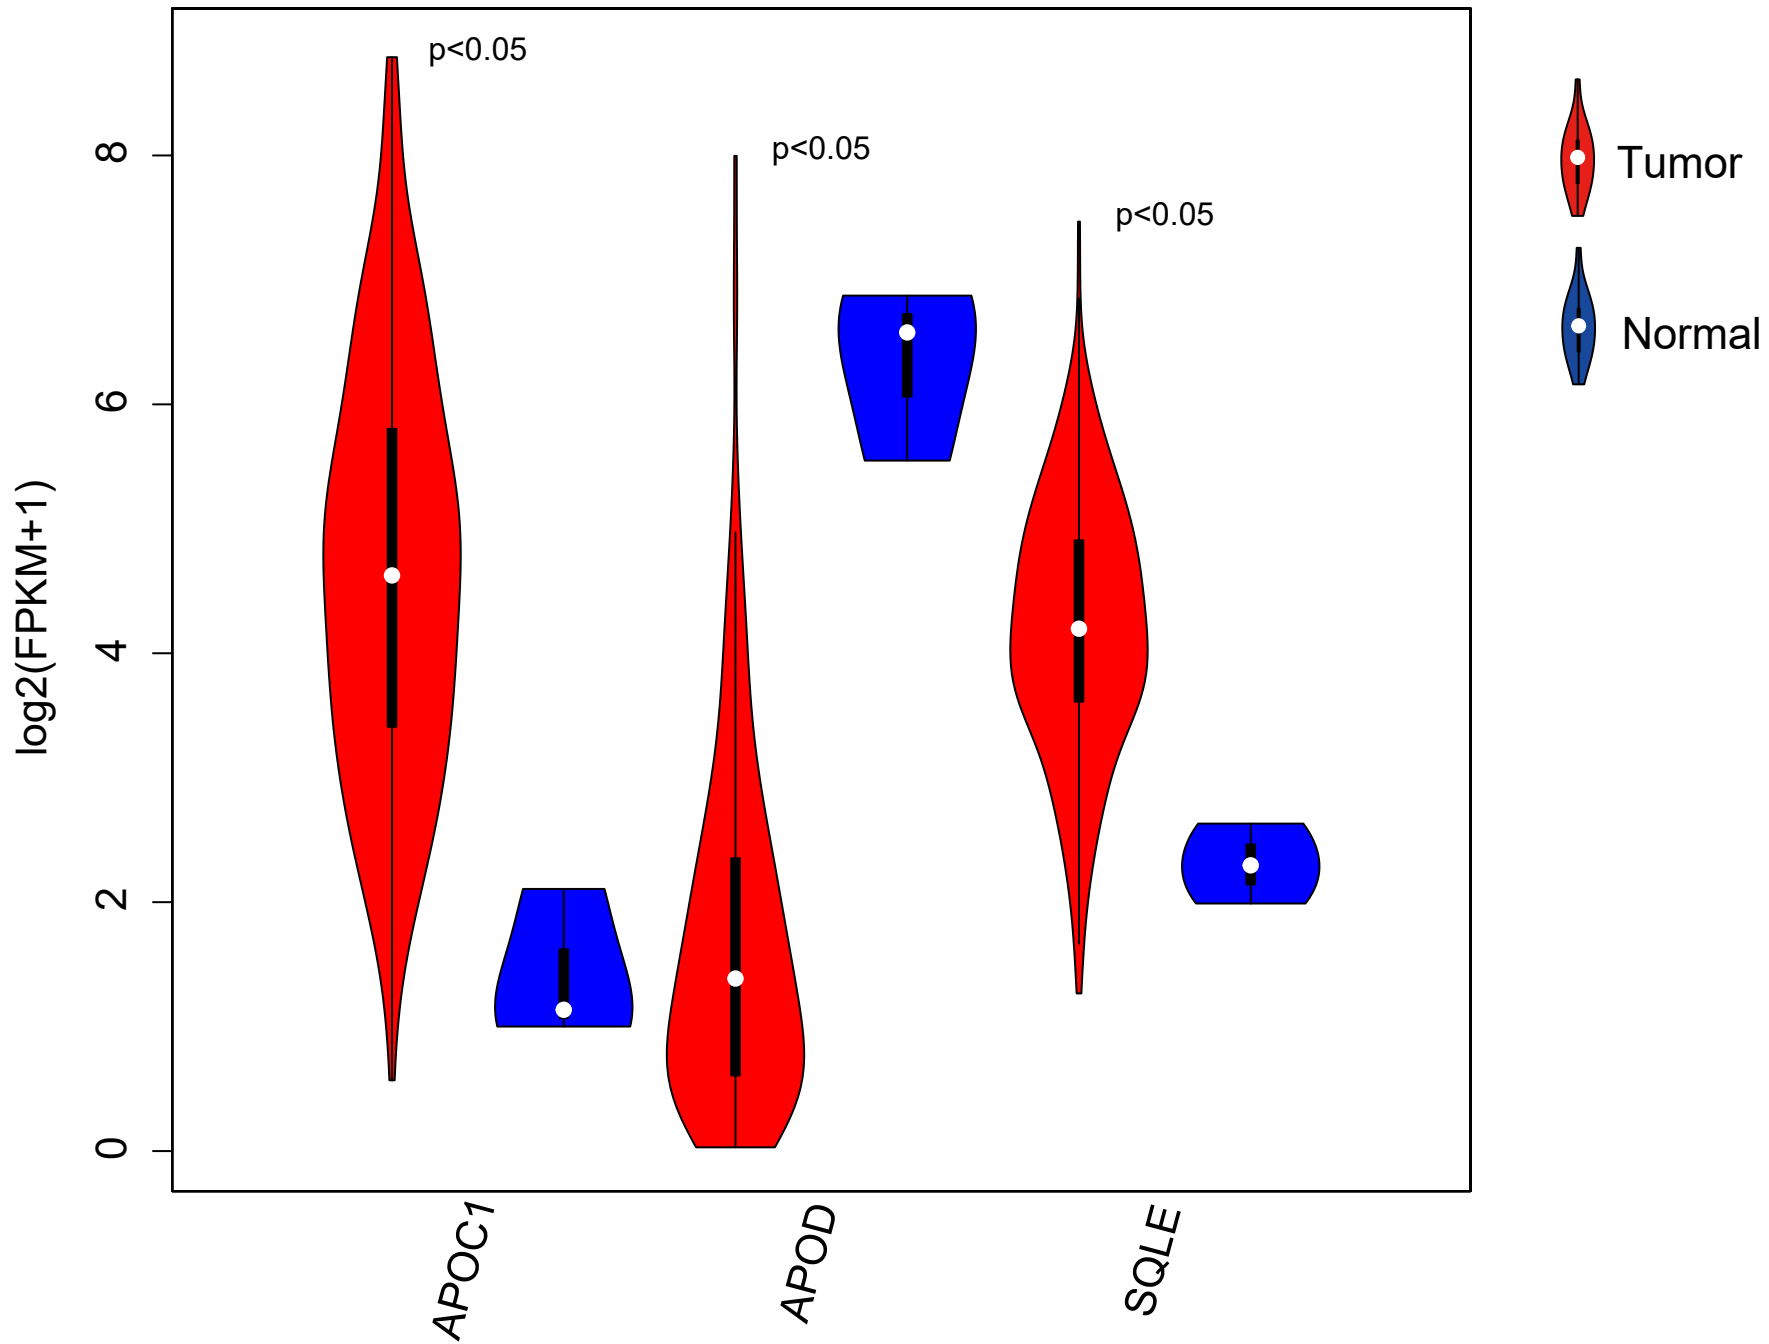

Supplement: 12905_2022_2083_MOESM1_ESM.pdf [file 12905_2022_2083_MOESM1_ESM.pdf]
