# Supplementary material for: A risk prediction model mediated by genes of APOD/APOC1/SQLE associates with prognosis in cervical cancer
Source: PubMed Central journal article supplement (PMC9764686; doi:10.1186/s12905-022-02083-4), 2022-12-19

Figure S3 Correlation of riskscore with prognostic factor. a Independent prognostic - univariate cox results of forest plots (Training set + Test Set).  
 b Independent prognostic - multivariate cox results of forest plots (Training set + Test Set).  
 c Independent prognostic - univariate cox results of forest plots (Validation set).  
 d Independent prognostic - multivariate cox results of forest plots (Validation set).

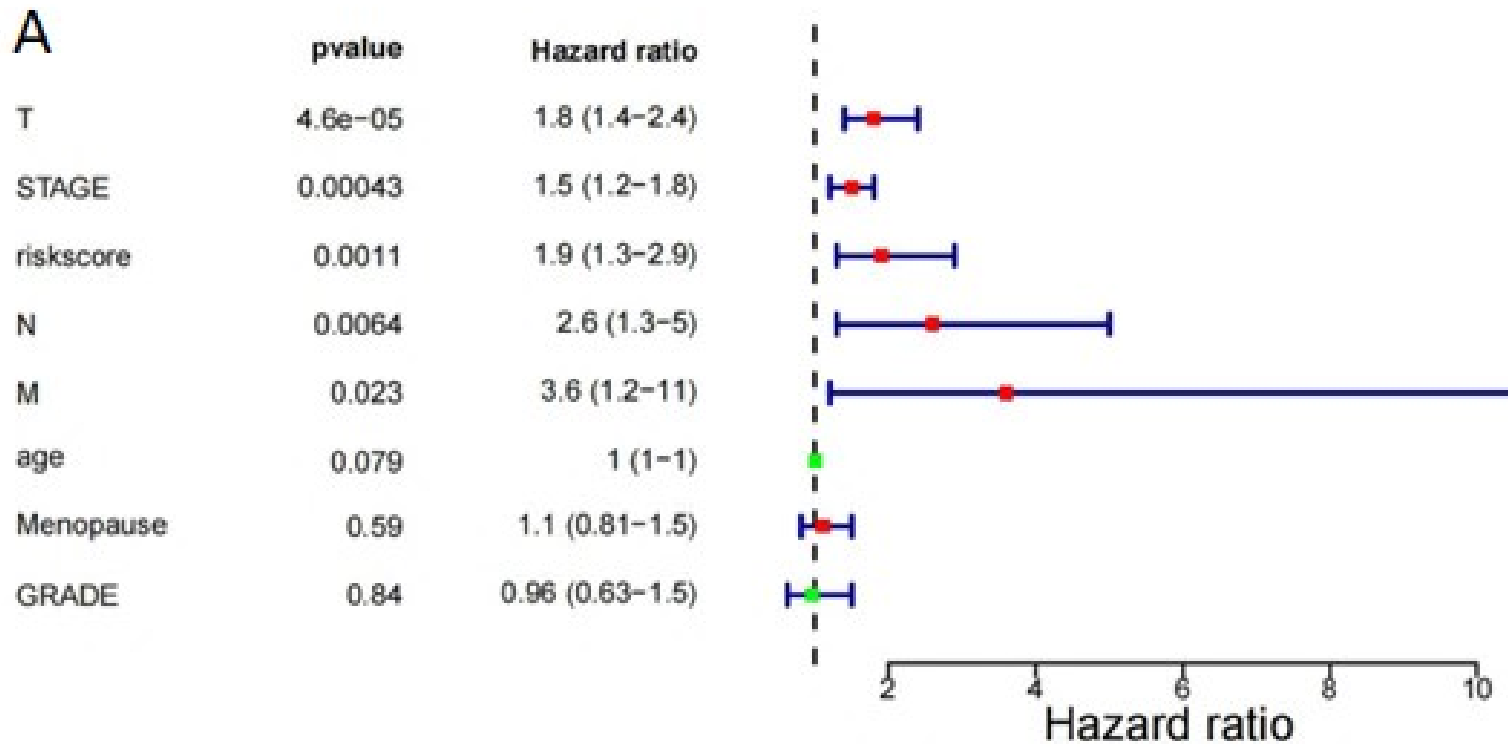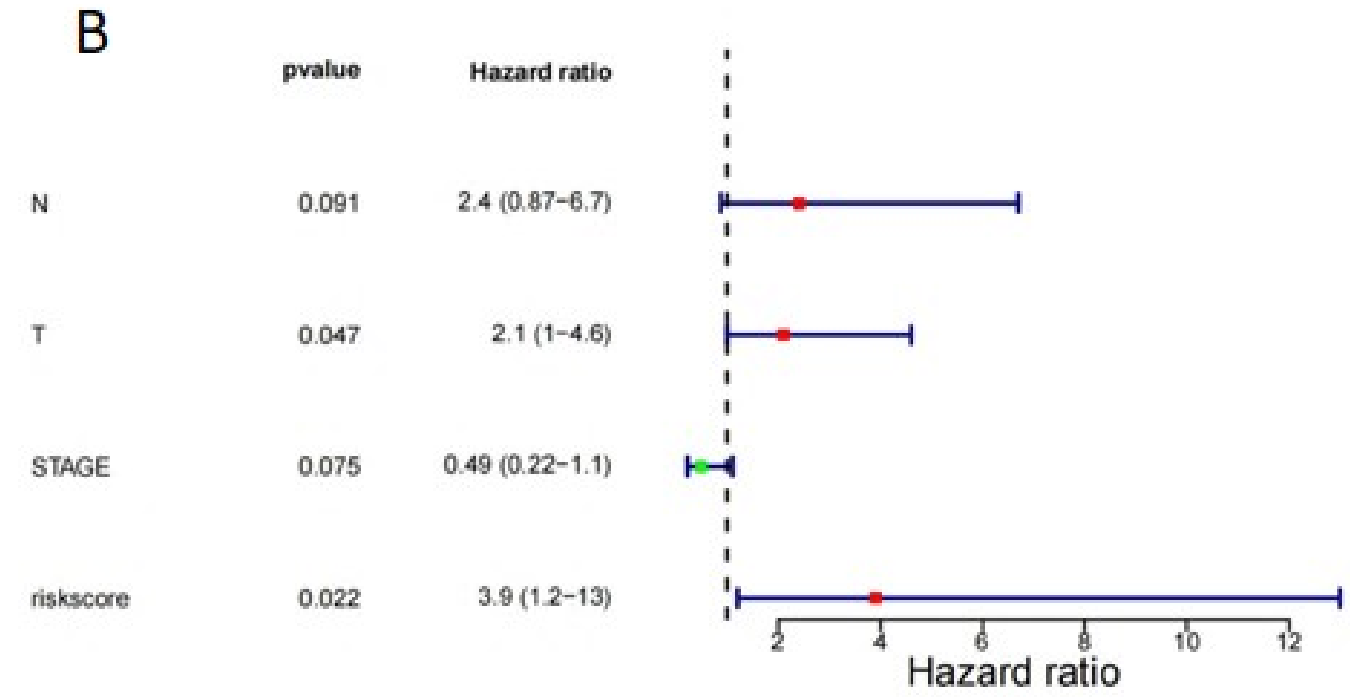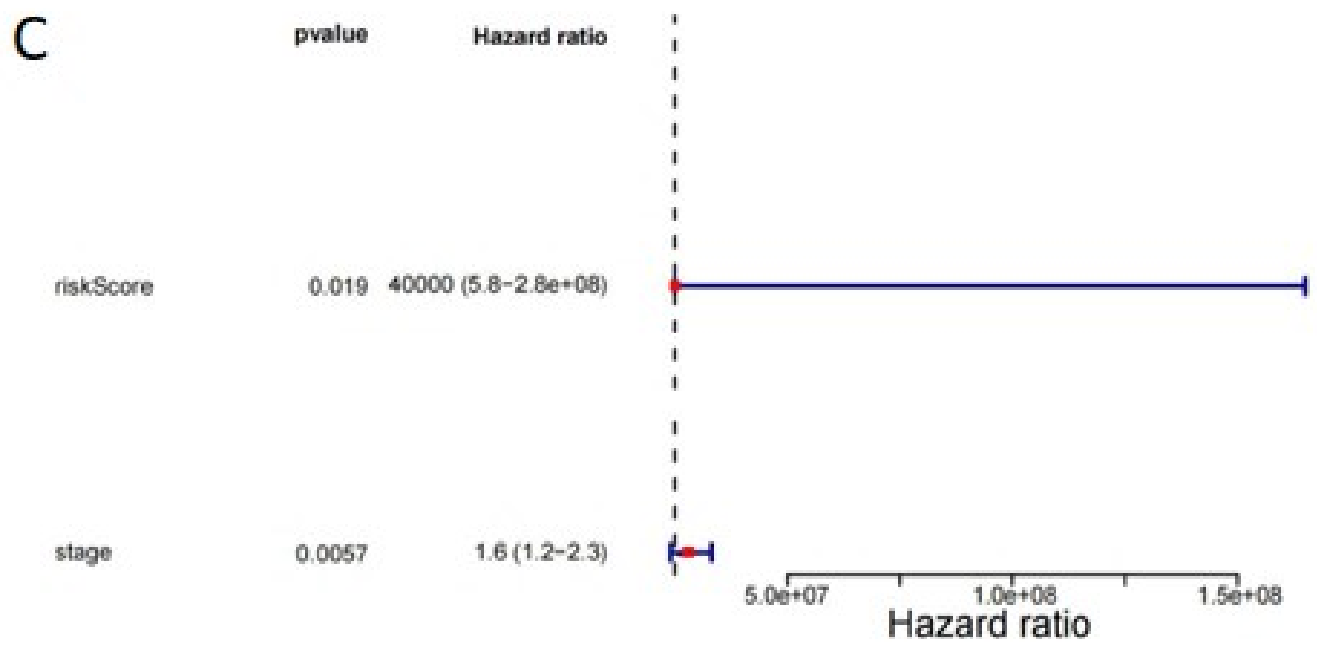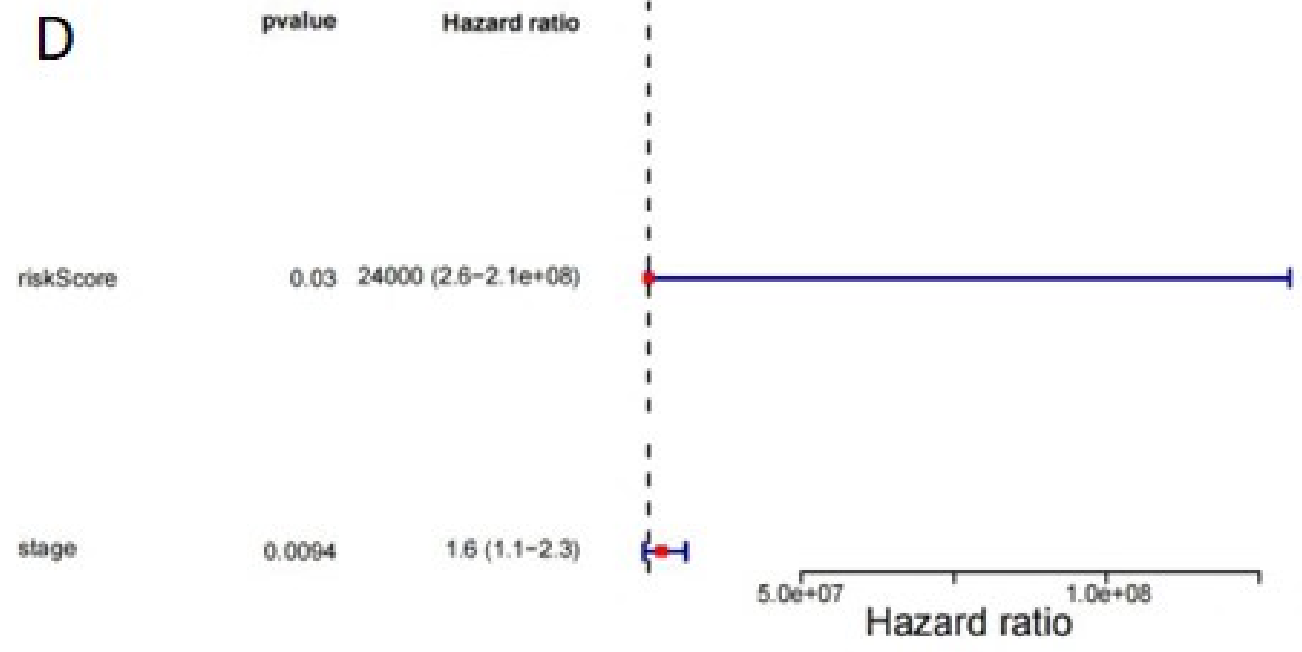

Supplement: 12905_2022_2083_MOESM3_ESM.pdf [file 12905_2022_2083_MOESM3_ESM.pdf]
